# Supplementary material for: Copper(i)-catalyzed benzylation of triazolopyridine through direct C–H functionalization
Source: Royal Society of Chemistry journal article supplement (doi:10.1039/c9ob01433k), 2019-01-01

## Supporting Information

# Copper(I)-Catalyzed Benzoylation of Triazolopyridine Through Direct C-H Functionalization

Madhava Reddy Lonka, Jinquan Zhang, Thirupathi Gogula and Hongbin Zou\*

College of Pharmaceutical Sciences, Zhejiang University, Hangzhou, 310058, P. R. China.

E-mail: zouhb@zju.edu.cn

### Table of contents

|                            |           |
|----------------------------|-----------|
| <b>1. NMR Spectra.....</b> | <b>S2</b> |
|----------------------------|-----------|

# NMR Spectra

## [1,2,4]Triazolo[4,3-a]pyridine (1)

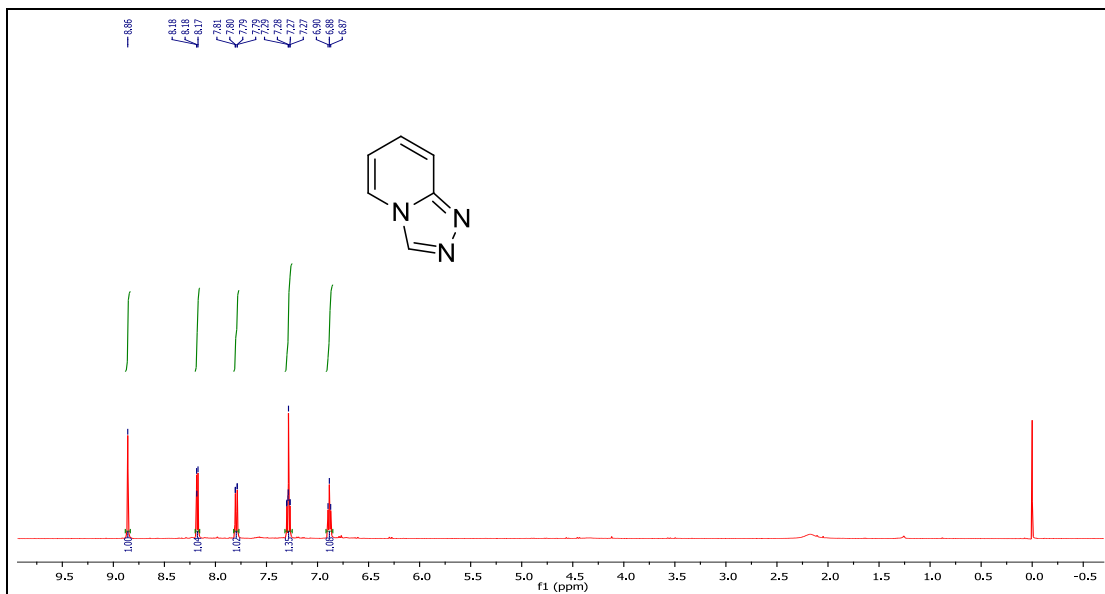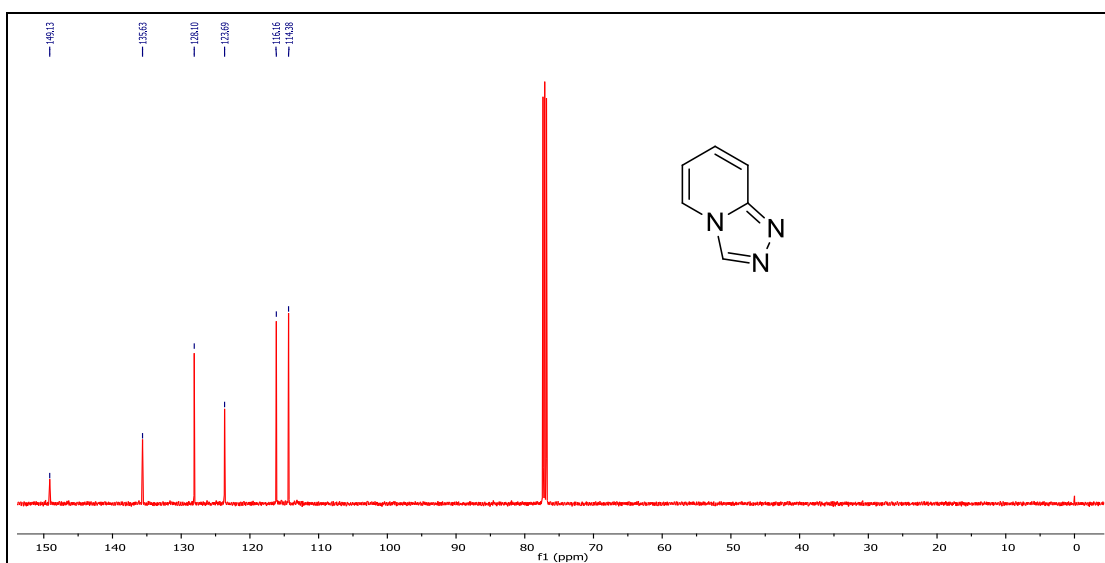

### 3-(1-Phenylethyl)-[1,2,4]triazolo[4,3-a]pyridine (3a)

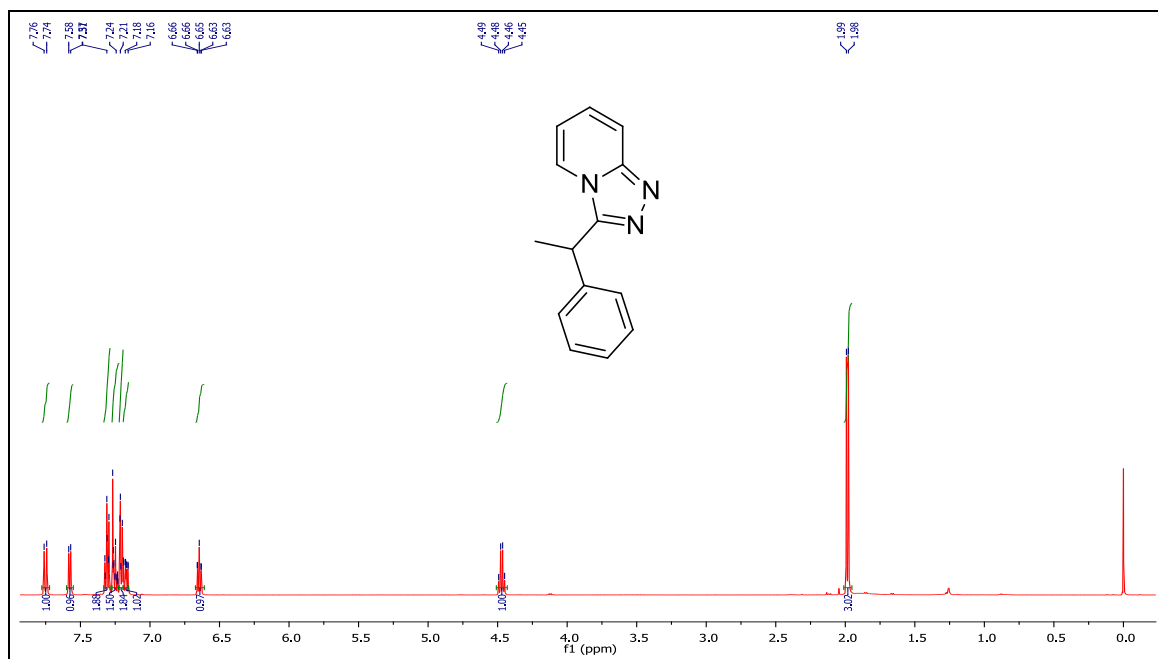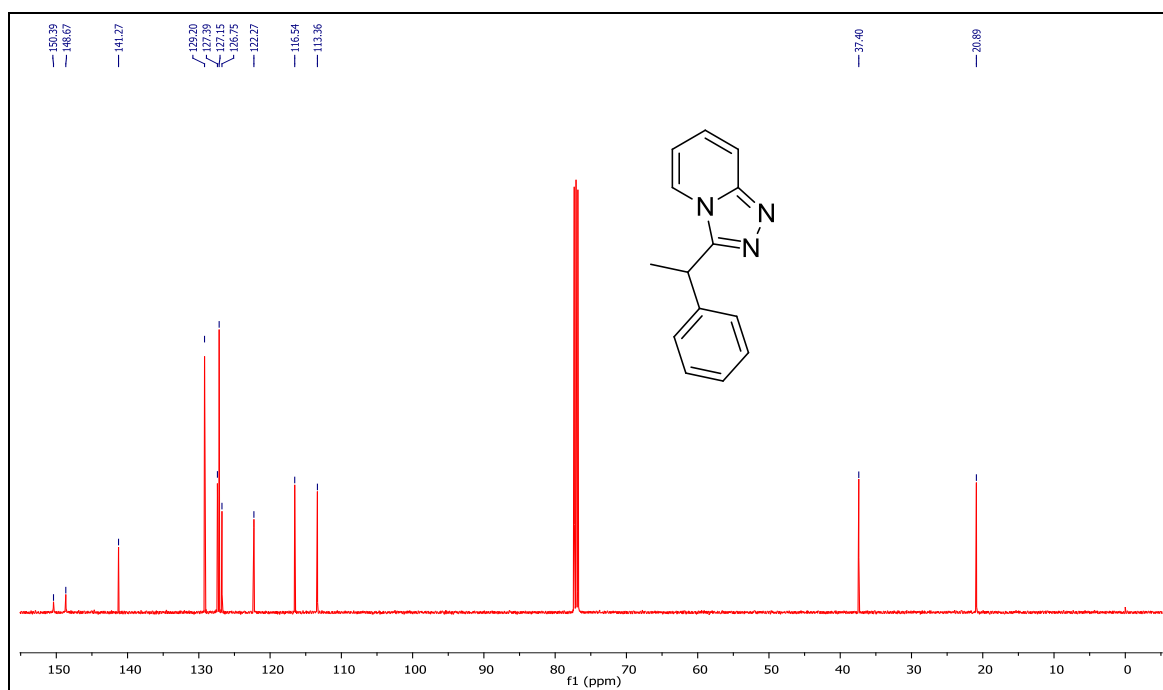

### 3-(1-(*p*-Tolyl)ethyl)-[1,2,4]triazolo[4,3-a]pyridine (3b)

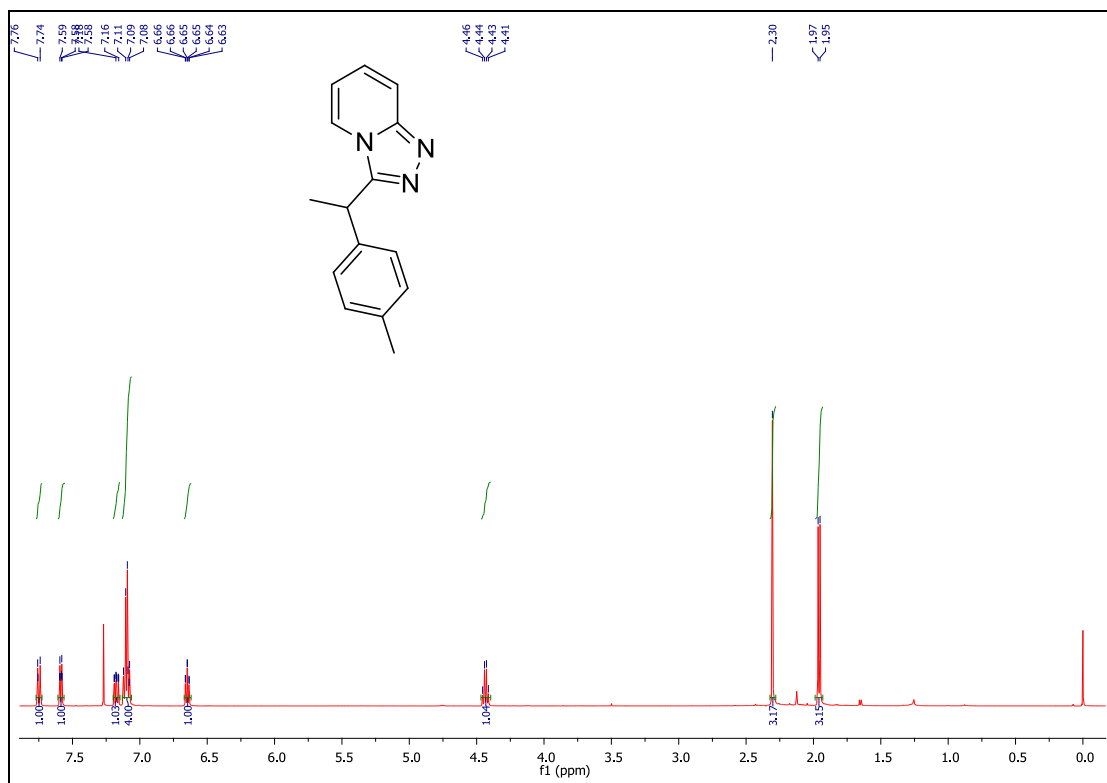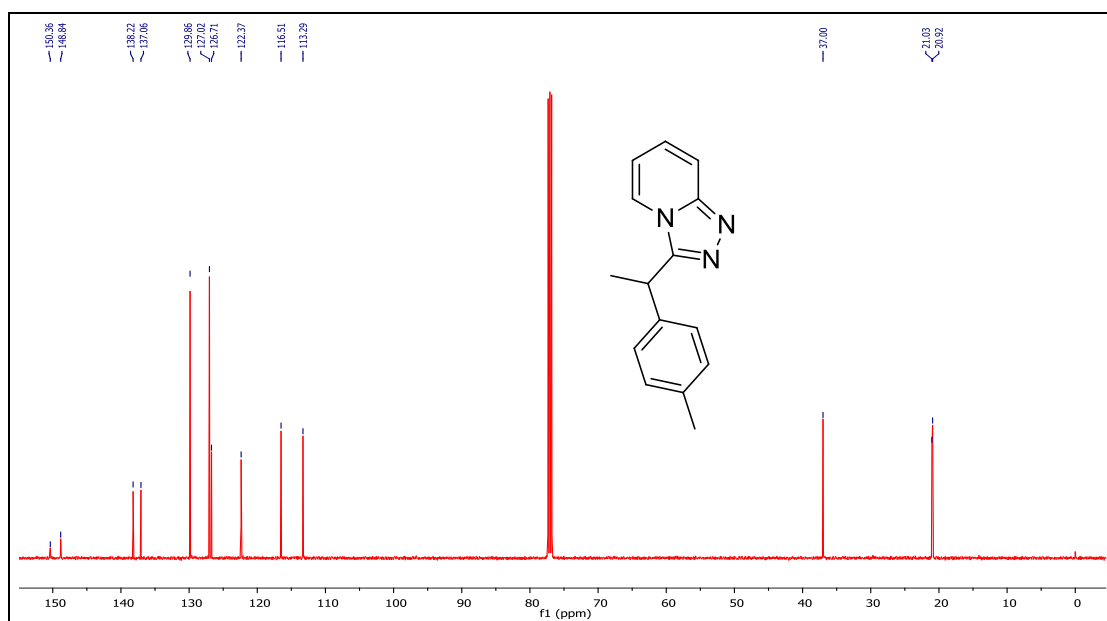

**3-(1-(4-Methoxyphenyl)ethyl)-[1,2,4]triazolo[4,3-a]pyridine (3c)**

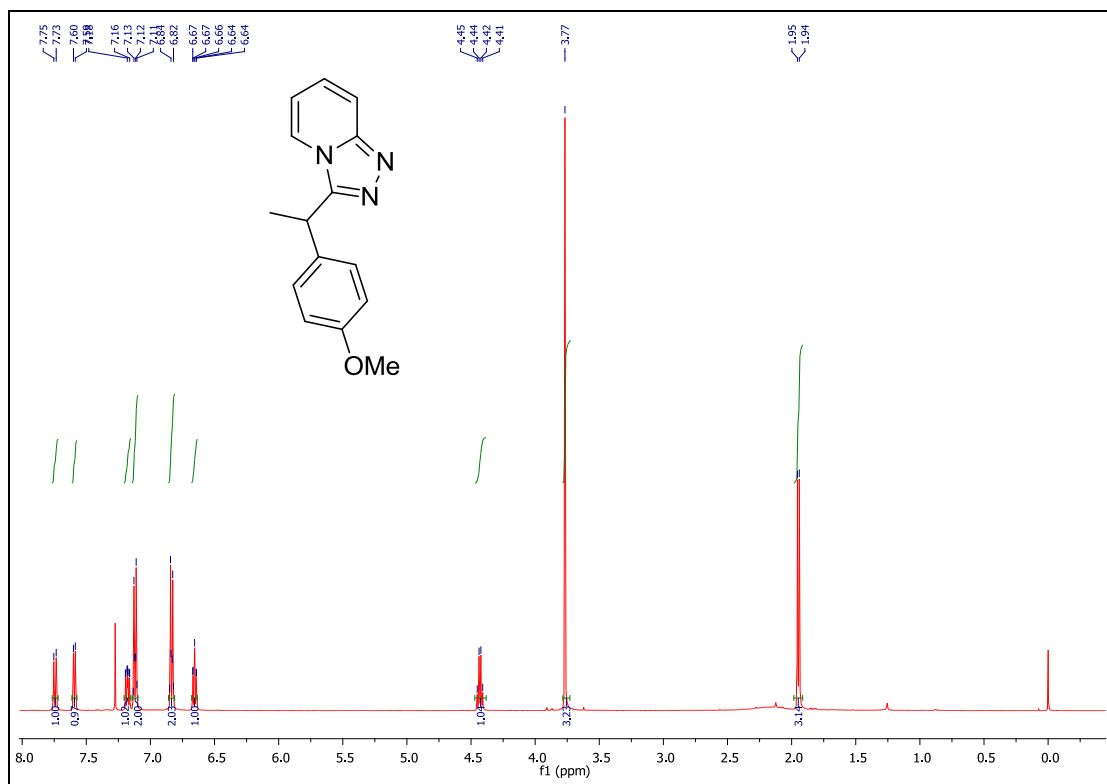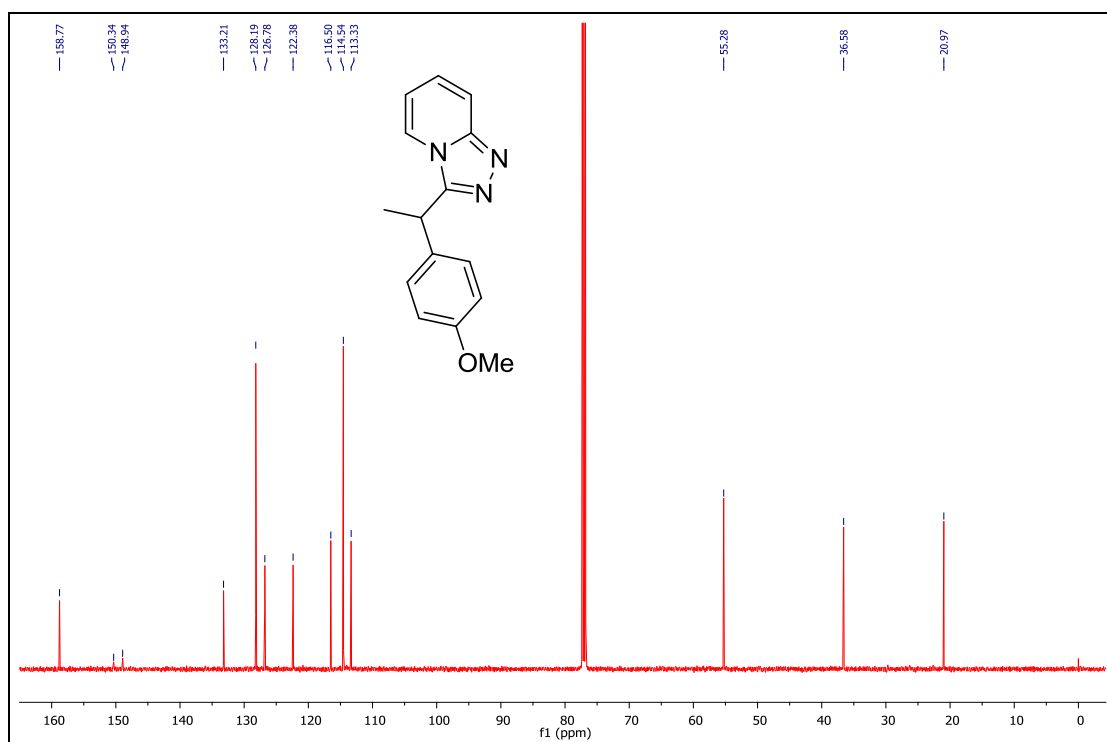

### 3-(1-(2,4-Dimethylphenyl)ethyl)-[1,2,4]triazolo[4,3-a]pyridine (3d)

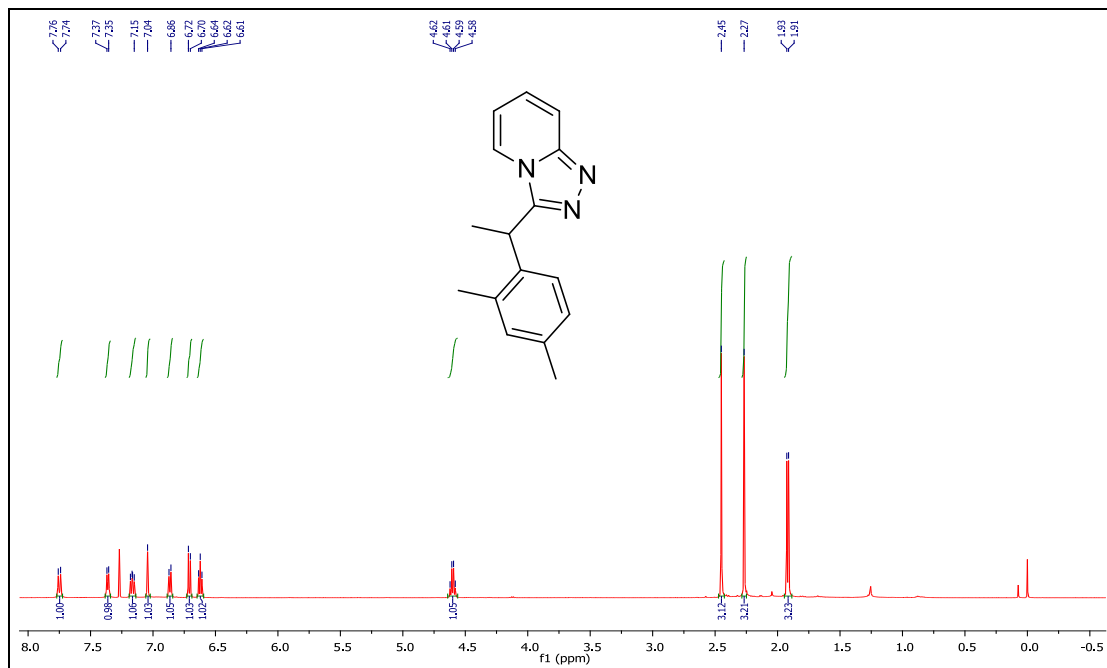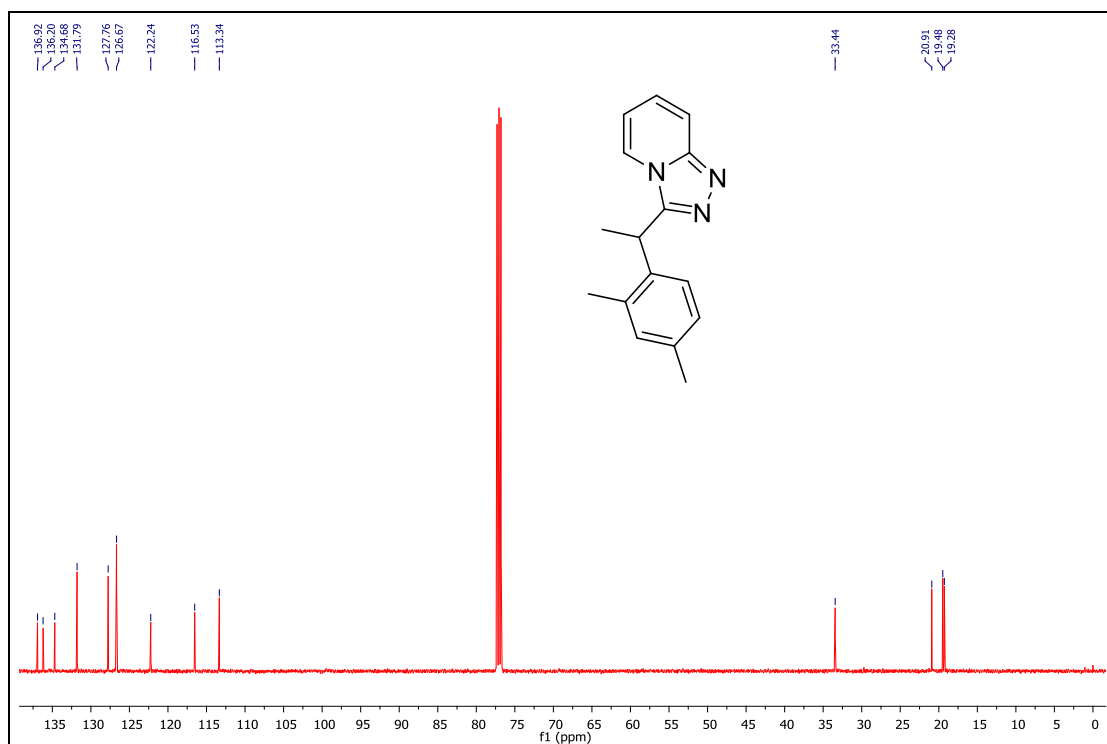

### 3-(1-(Benzo[d][1,3]dioxol-4-yl)ethyl)-[1,2,4]triazolo[4,3-a]pyridine (3e)

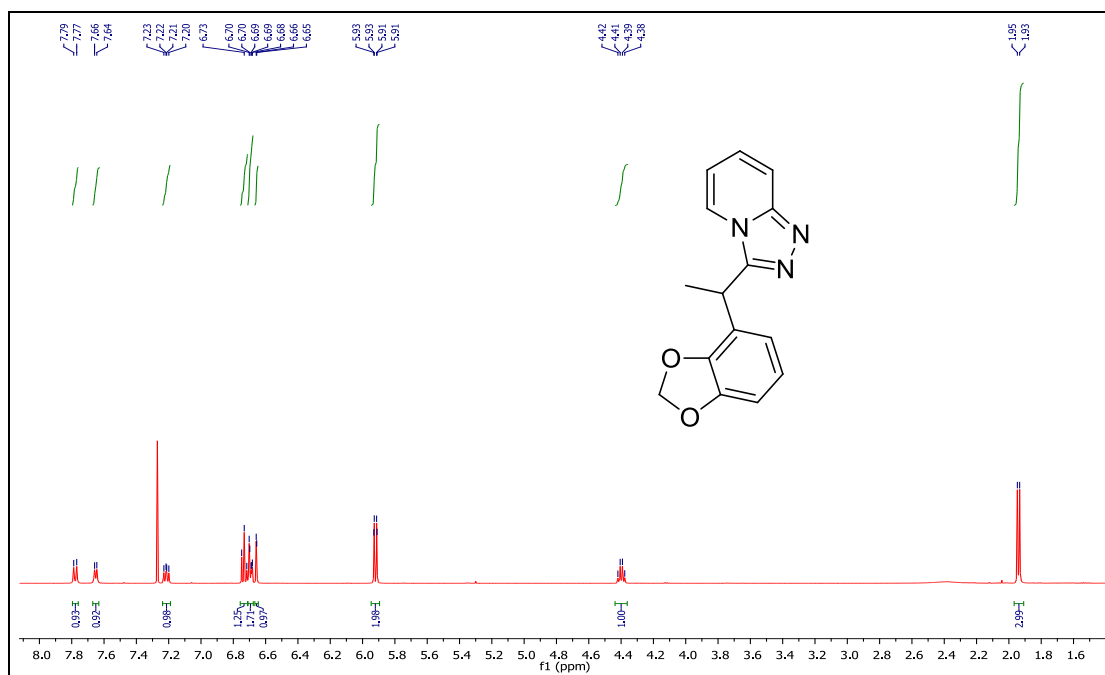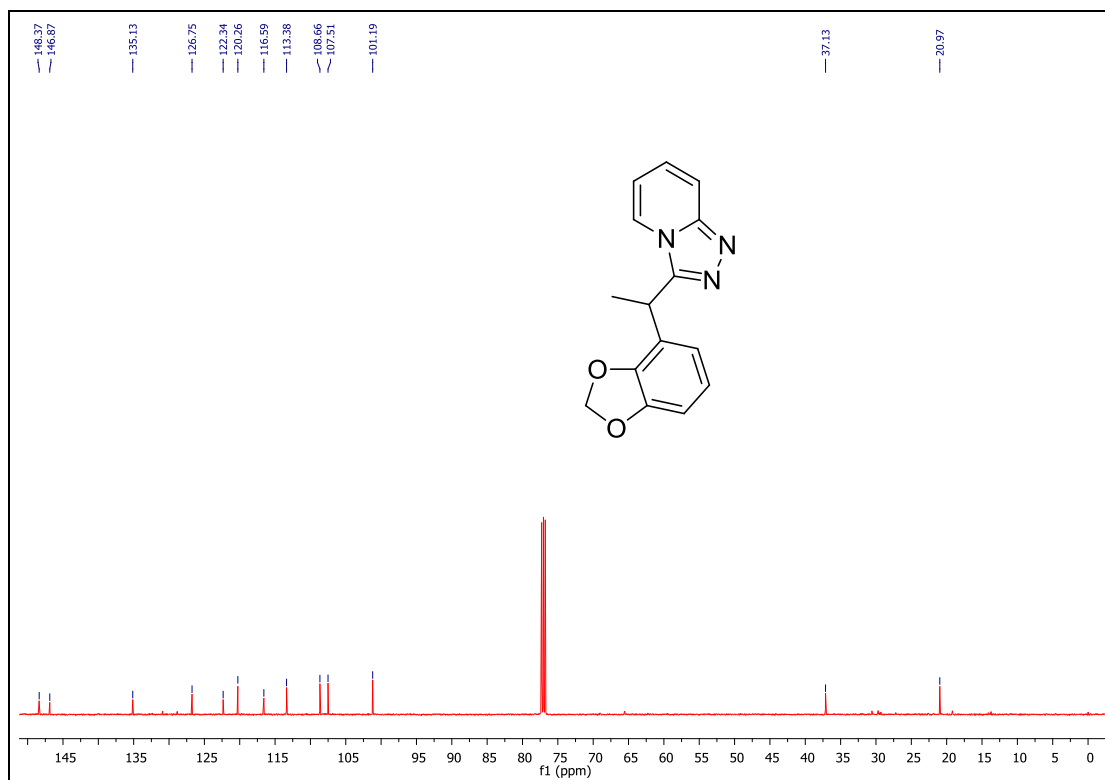

### 3-(1-*m*-Tolyl)ethyl)-[1,2,4]triazolo[4,3-*a*]pyridine (3f)

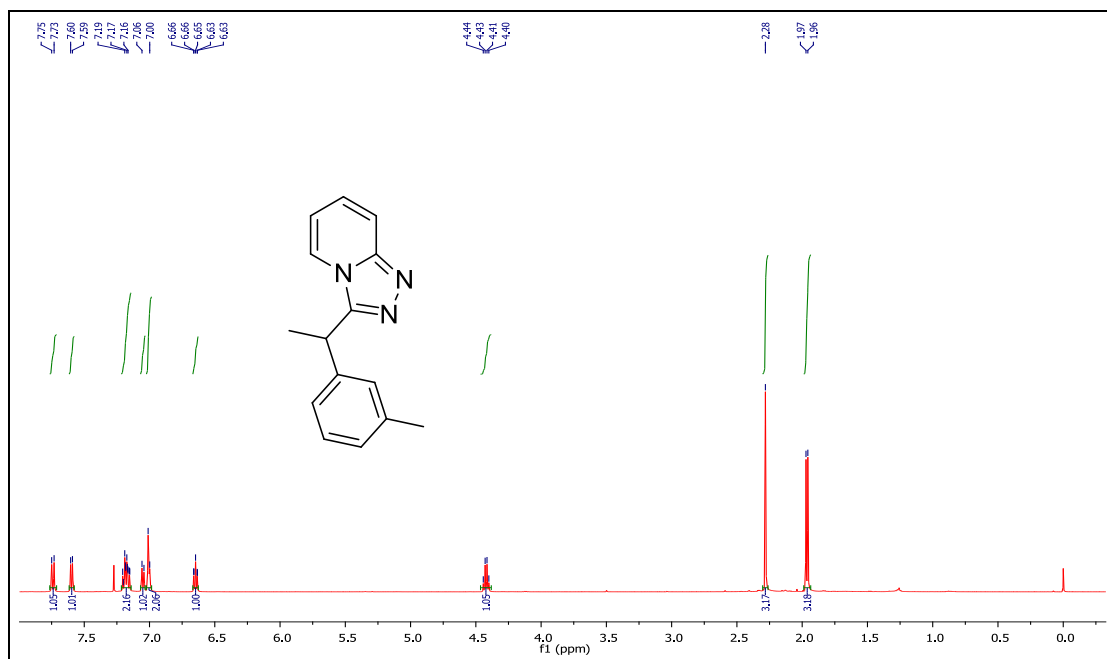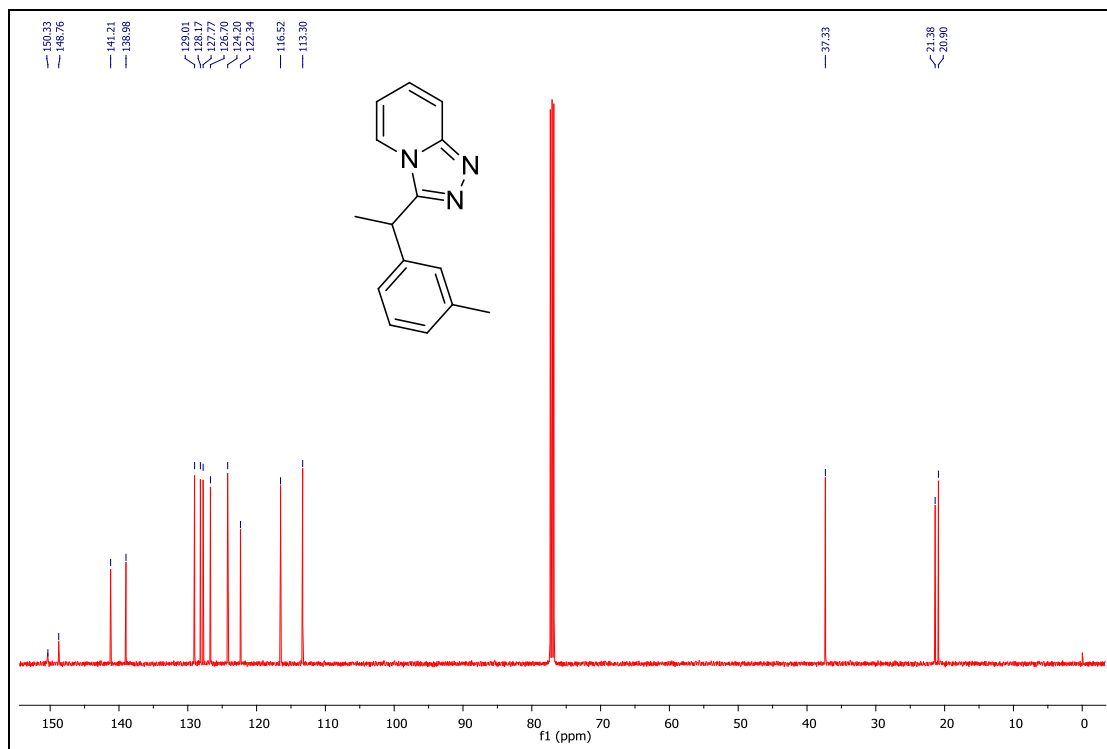



### 3-(1-(4-Fluorophenyl)ethyl)-[1,2,4]triazolo[4,3-a]pyridine (3g)

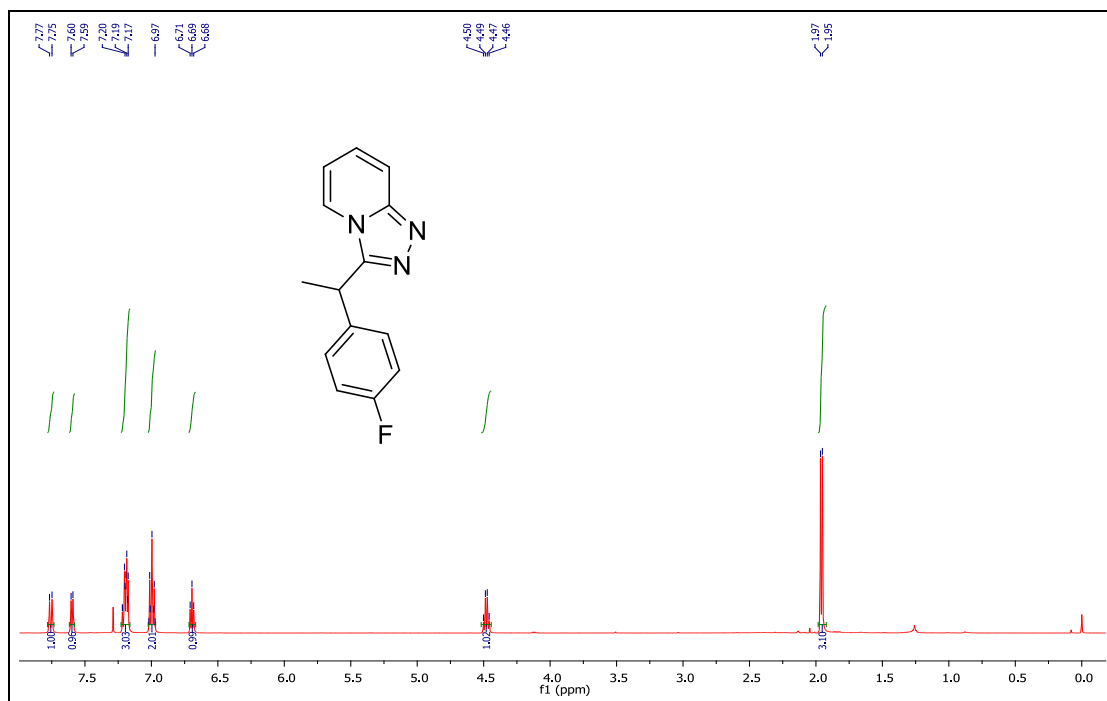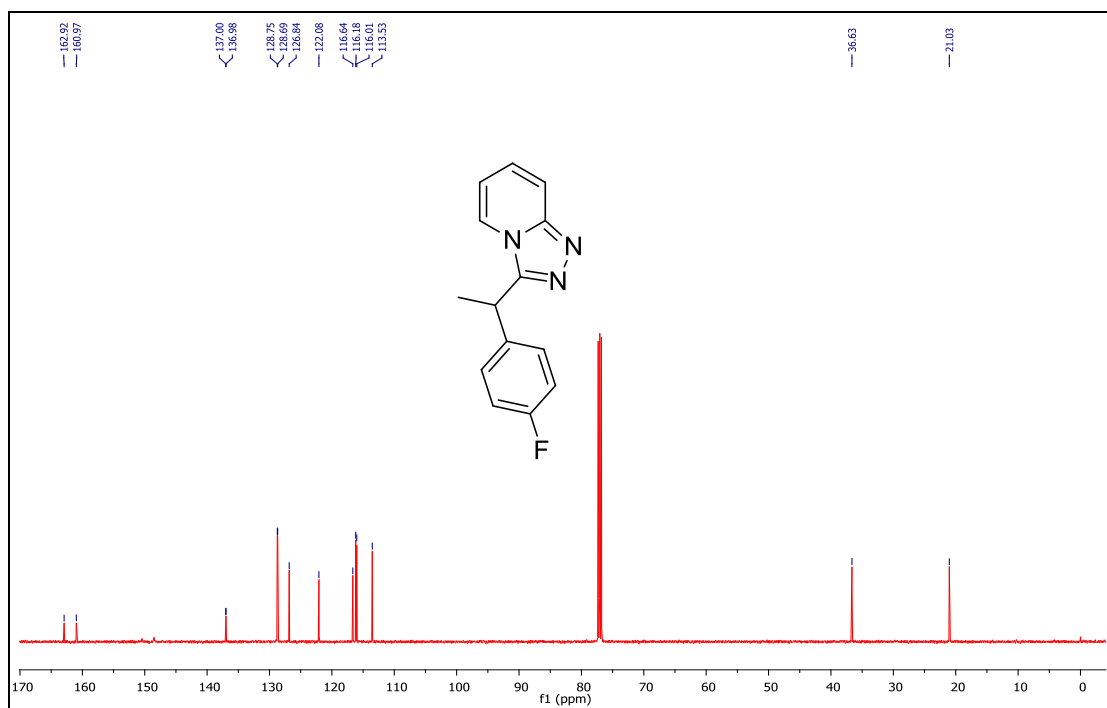

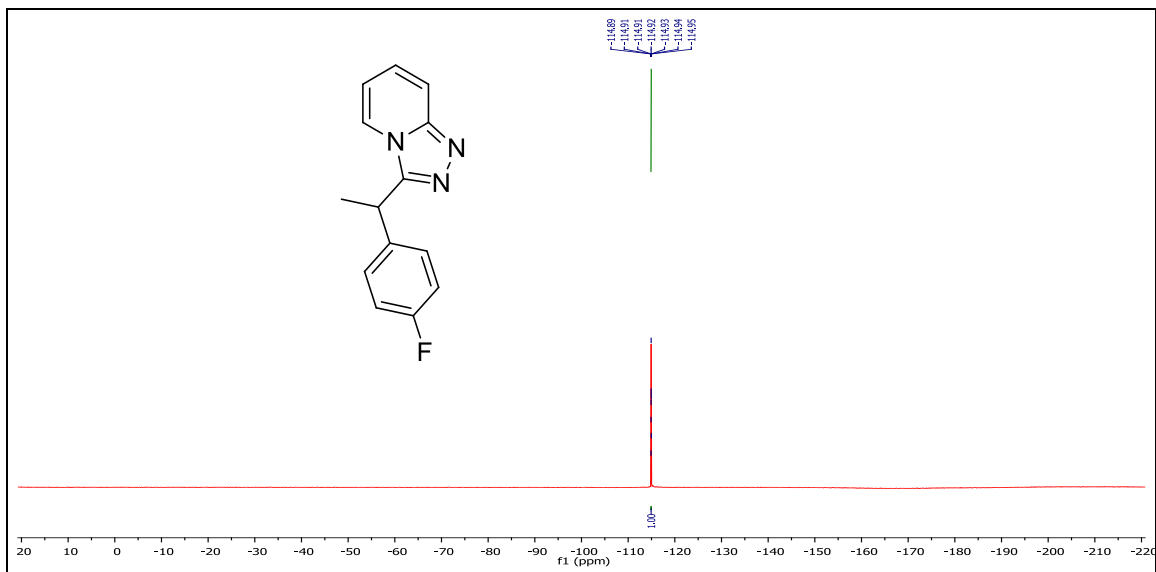

### 3-(1-(4-Chlorophenyl)ethyl)-[1,2,4]triazolo[4,3-a]pyridine (3h)

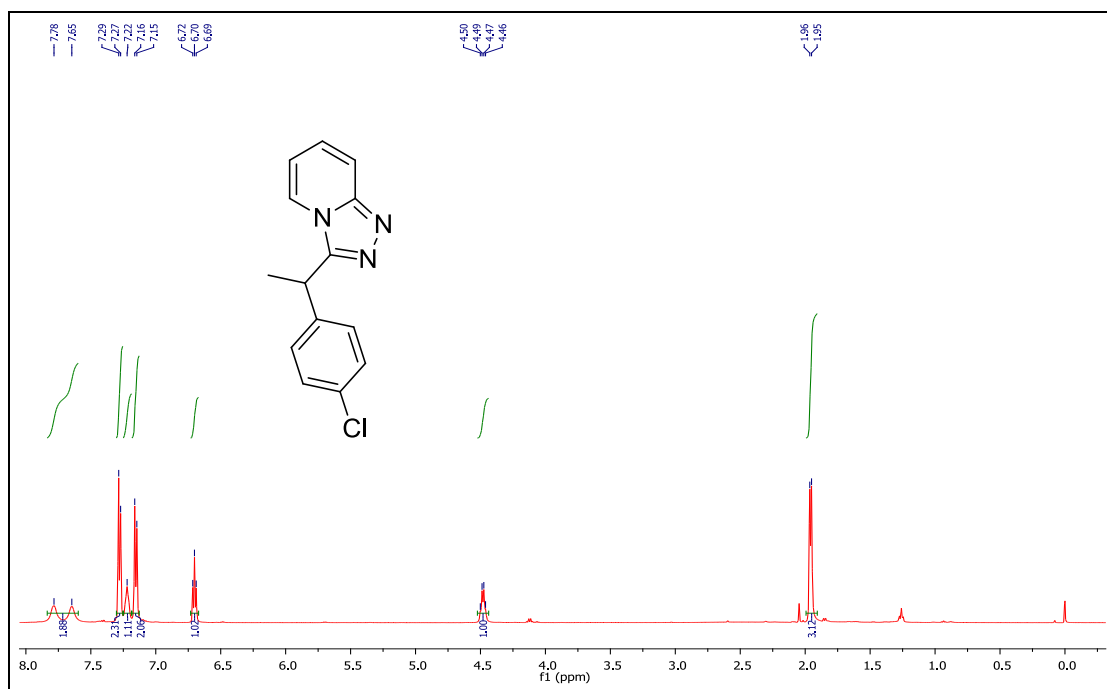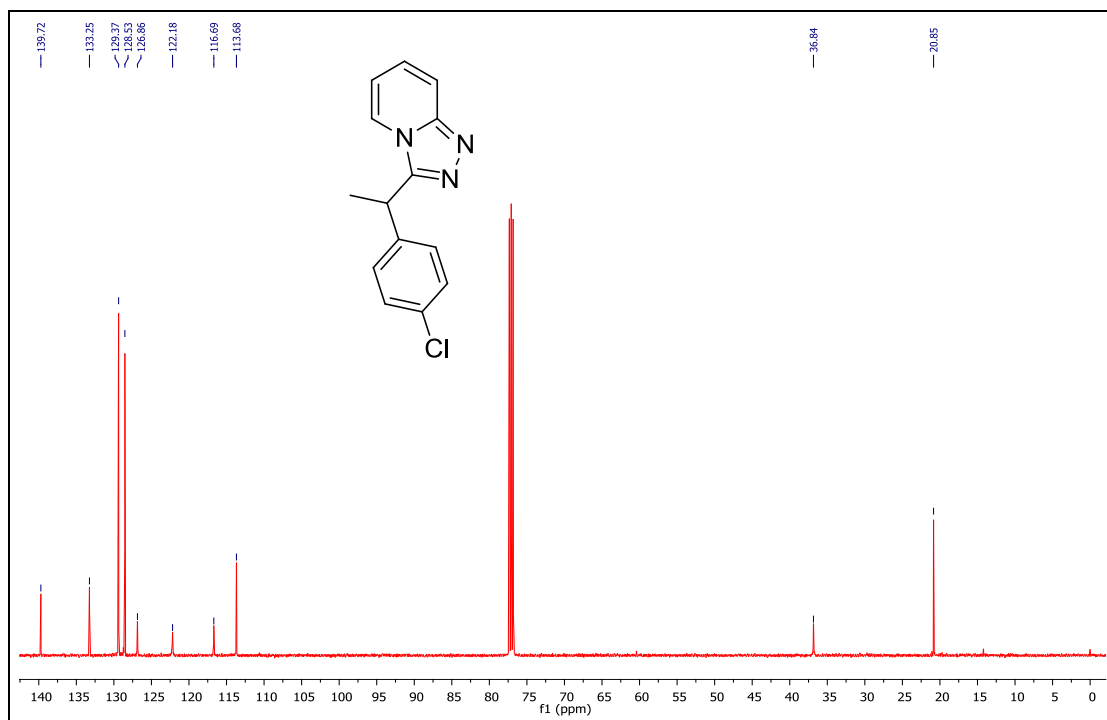

### 3-(1-(4-Bromophenyl)ethyl)-[1,2,4]triazolo[4,3-a]pyridine (3i)

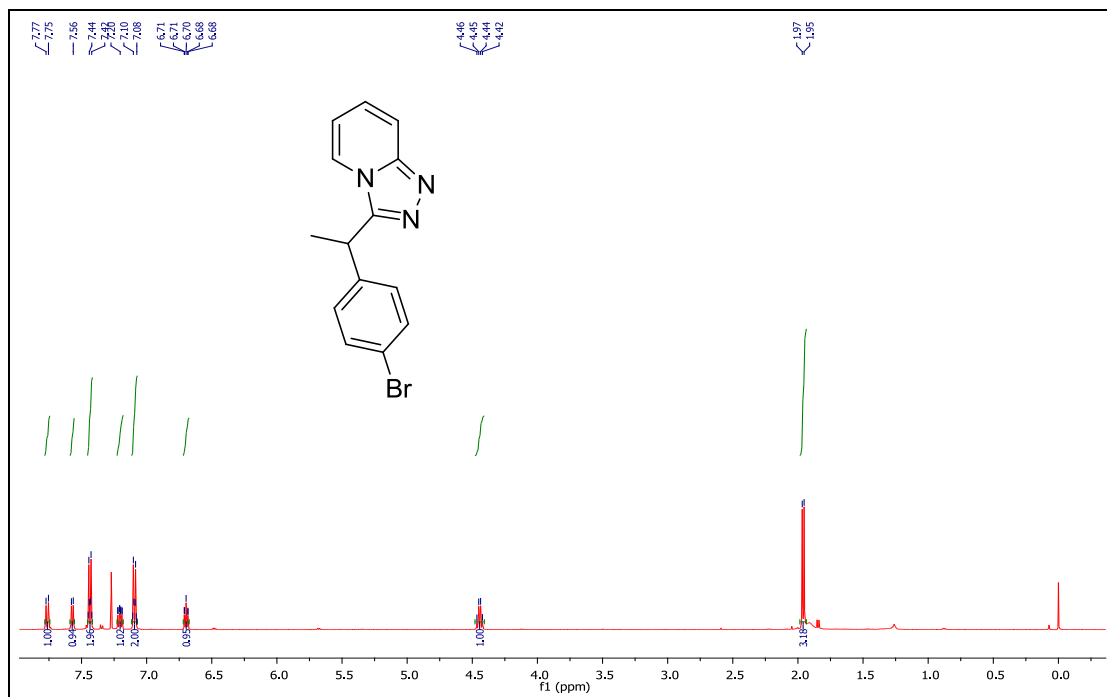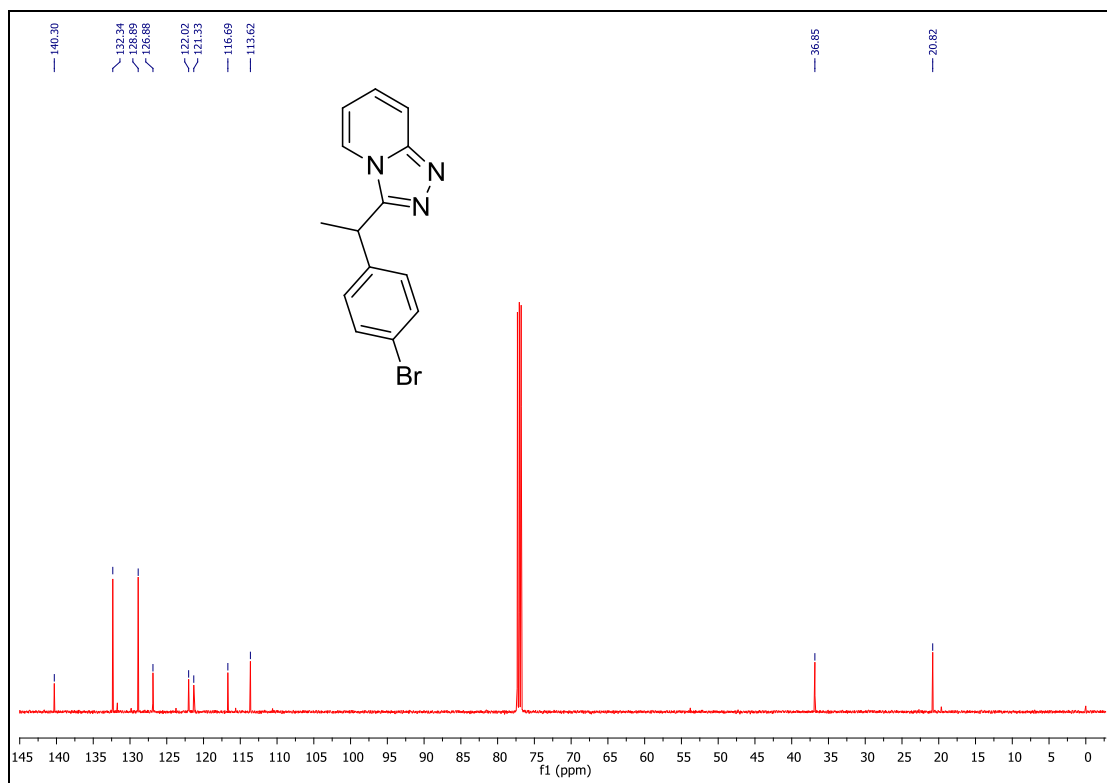

**3-(1-(4-(Trifluoromethyl)phenyl)ethyl)-[1,2,4]triazolo[4,3-a]pyridine (3j)**

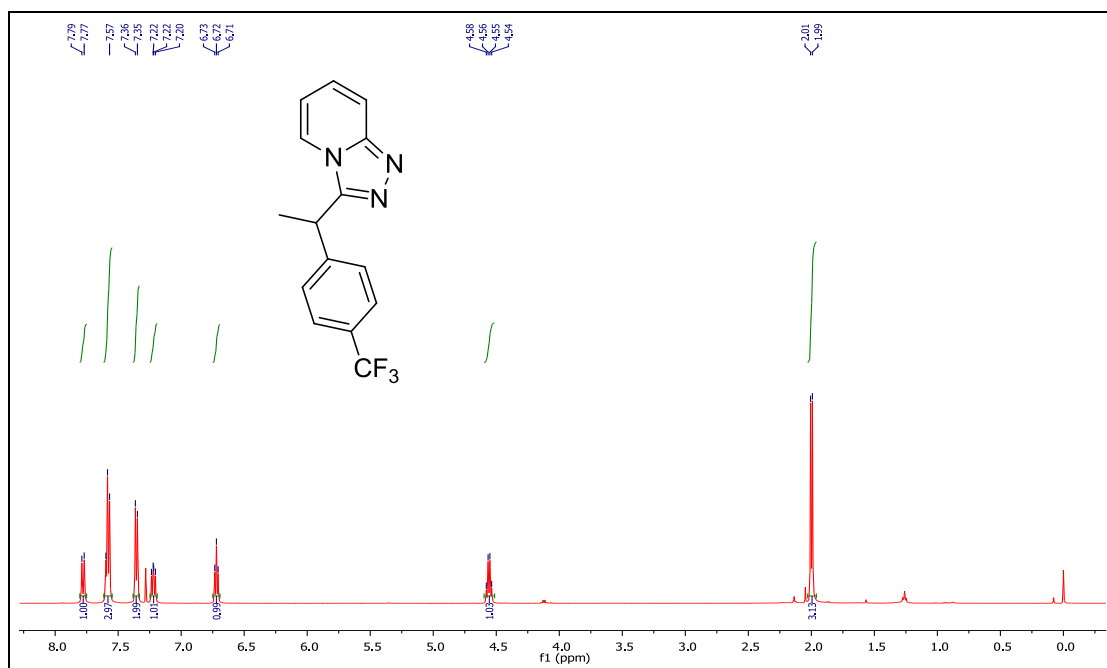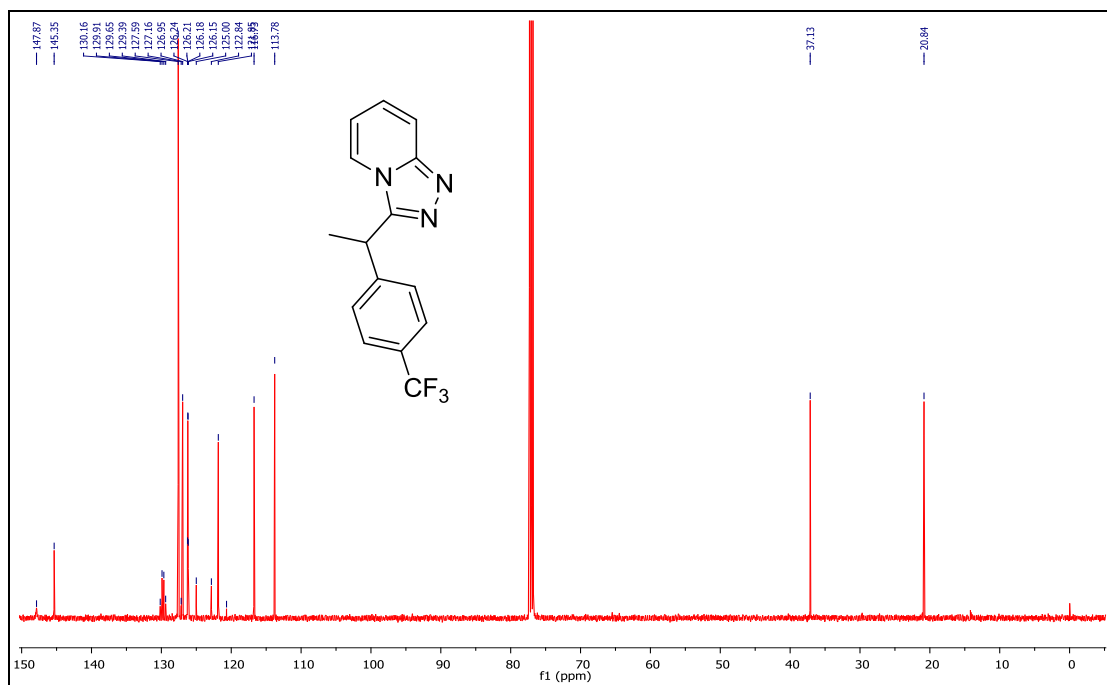

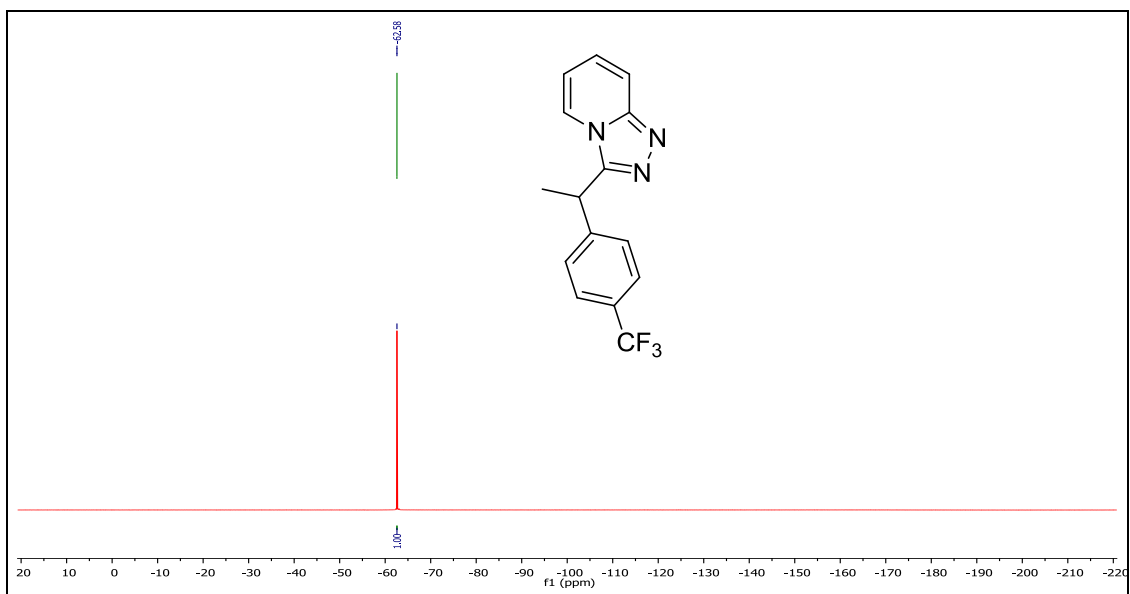

4-(1-([1,2,4]Triazolo[4,3-a]pyridin-3-yl)ethyl)benzonitrile (3k)

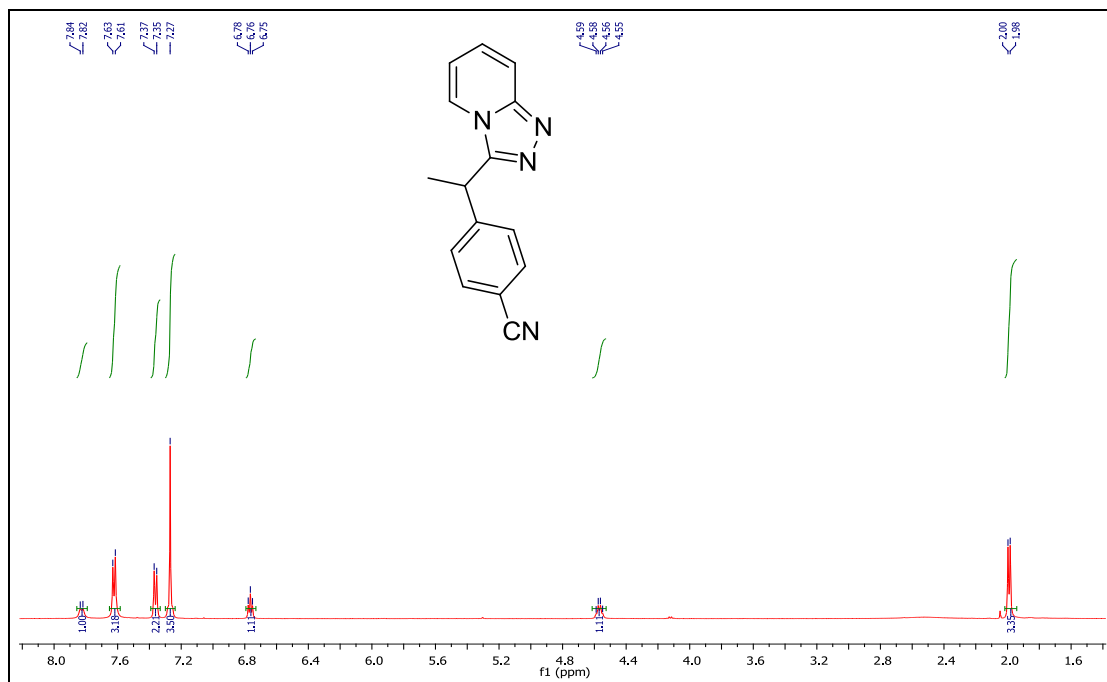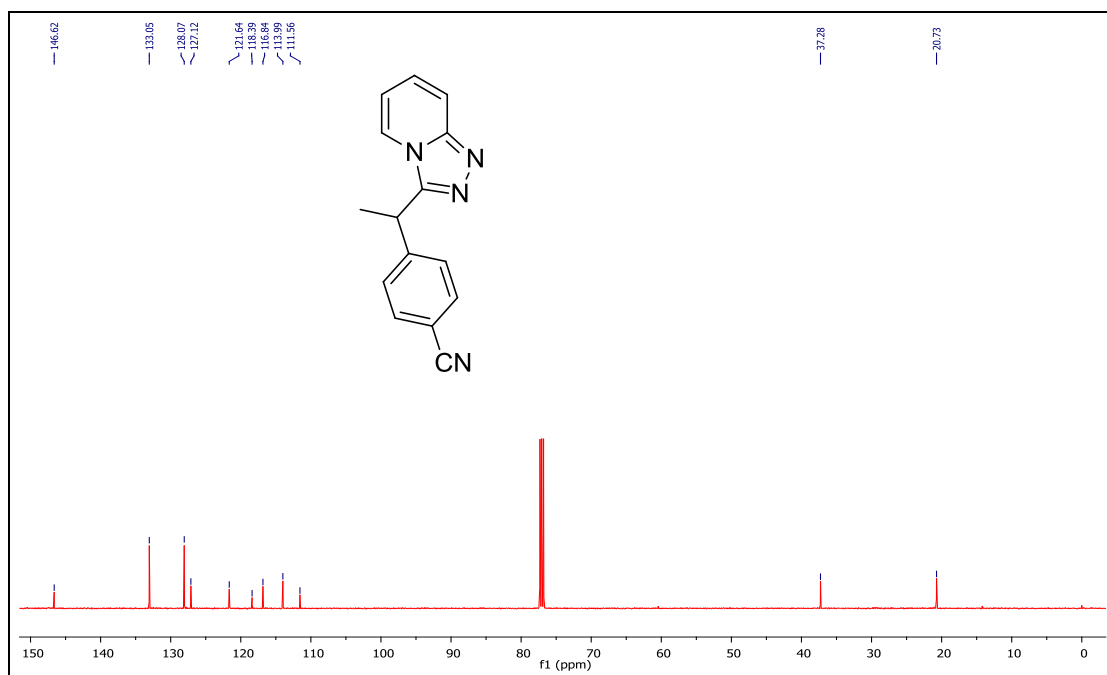

### 3-(1-(2,4-Difluorophenyl)ethyl)-[1,2,4]triazolo[4,3-a]pyridine (3l)

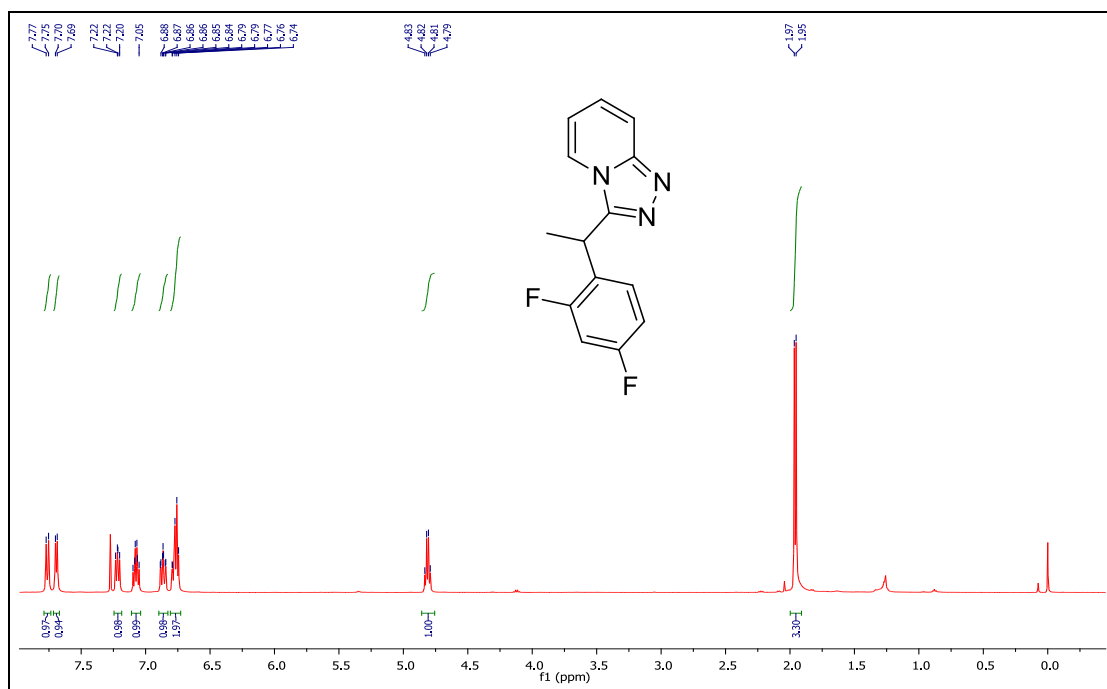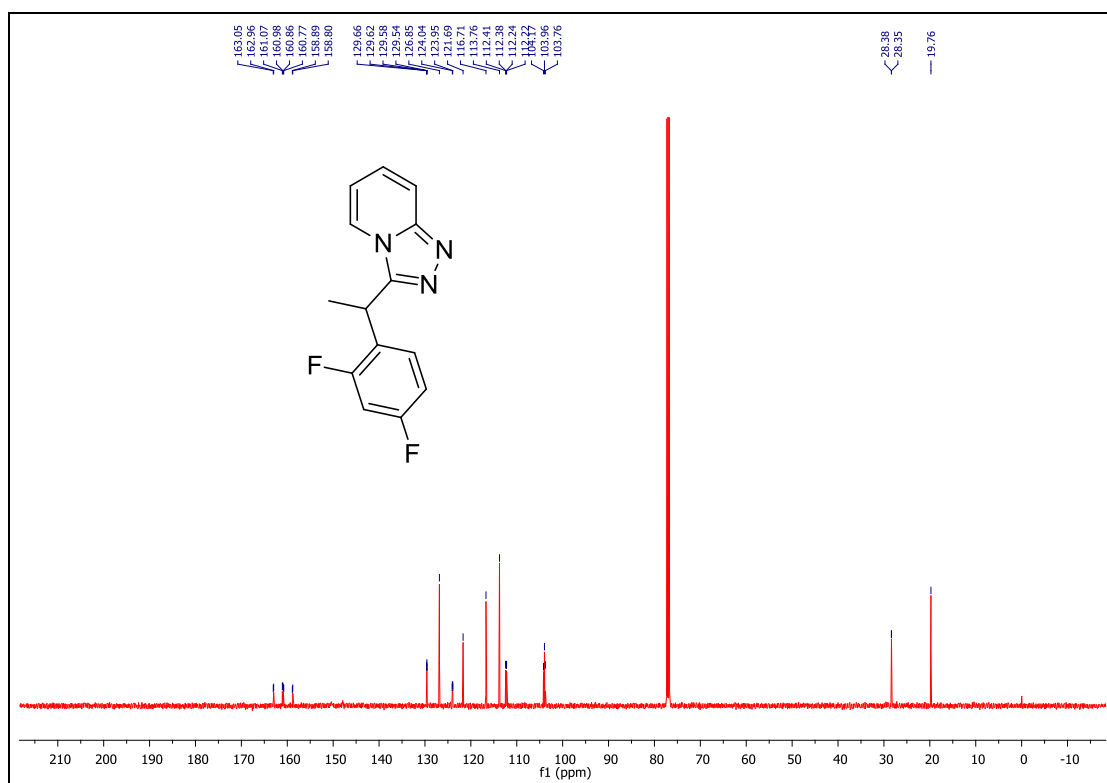



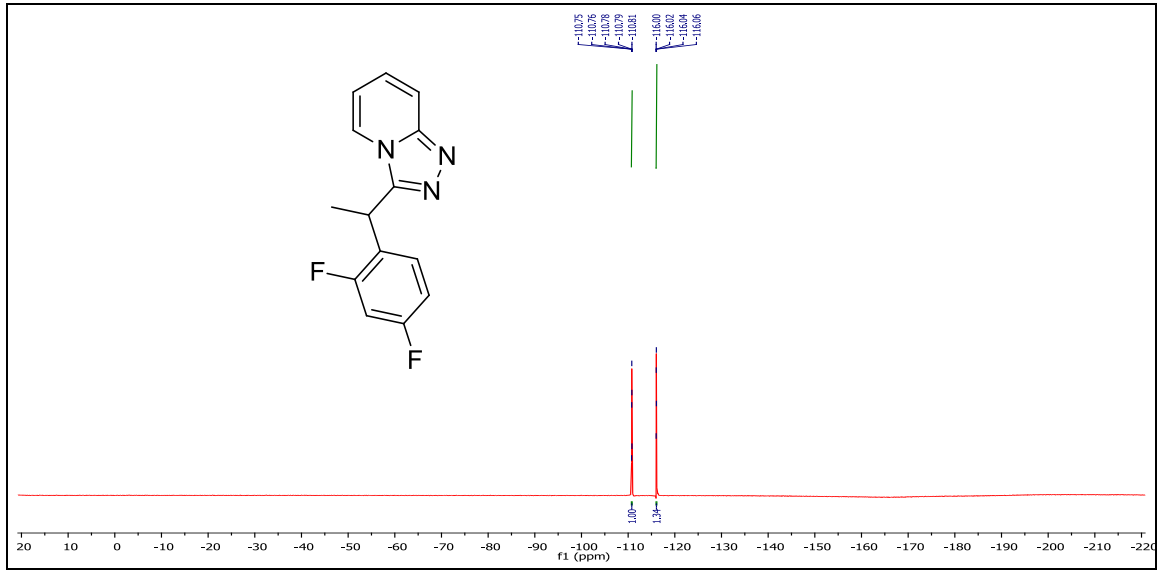

### 3-(1-(3-Bromophenyl)ethyl)-[1,2,4]triazolo[4,3-a]pyridine (3m)

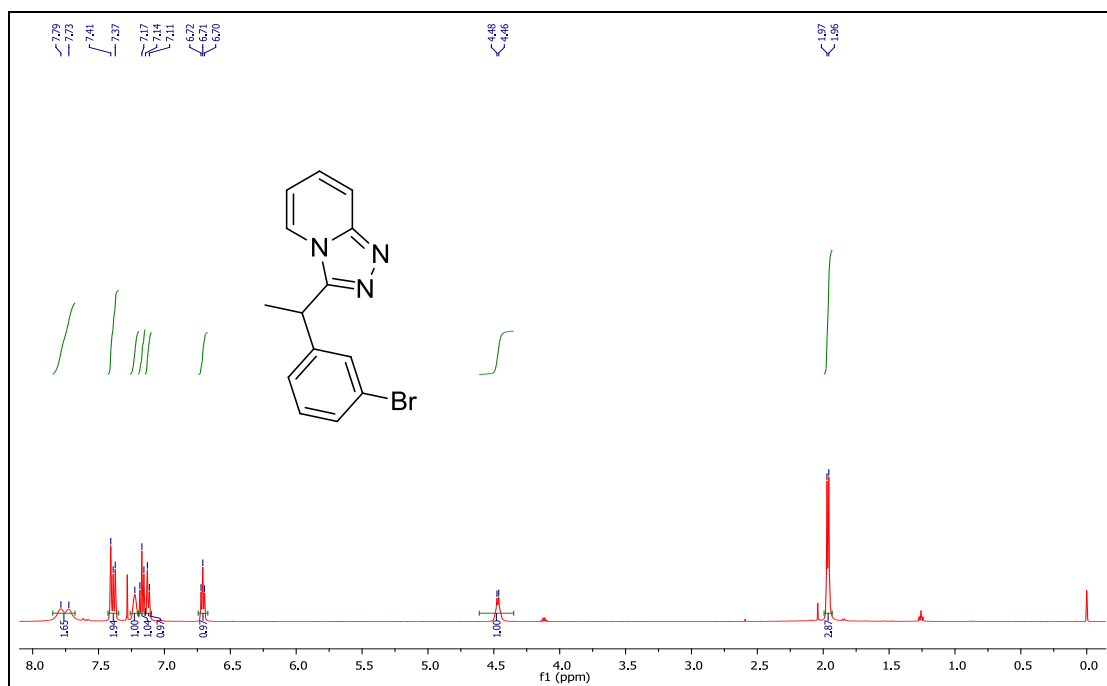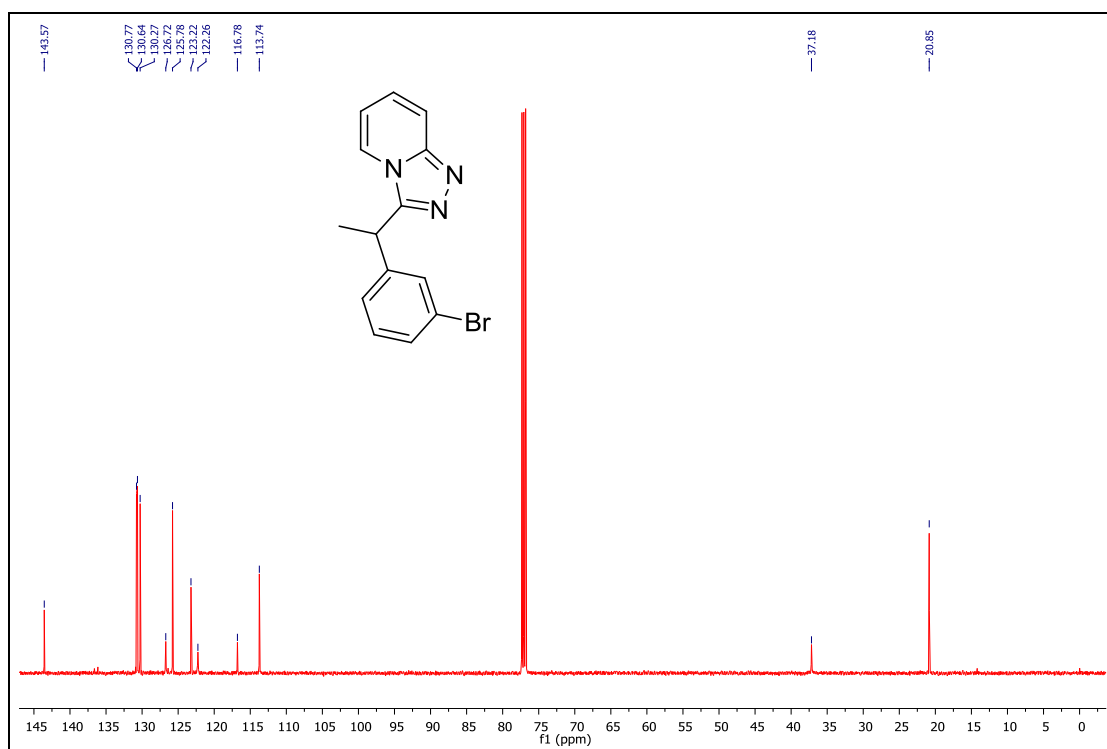

### 3-(1-(Furan-2-yl)ethyl)-[1,2,4]triazolo[4,3-a]pyridine (3n)

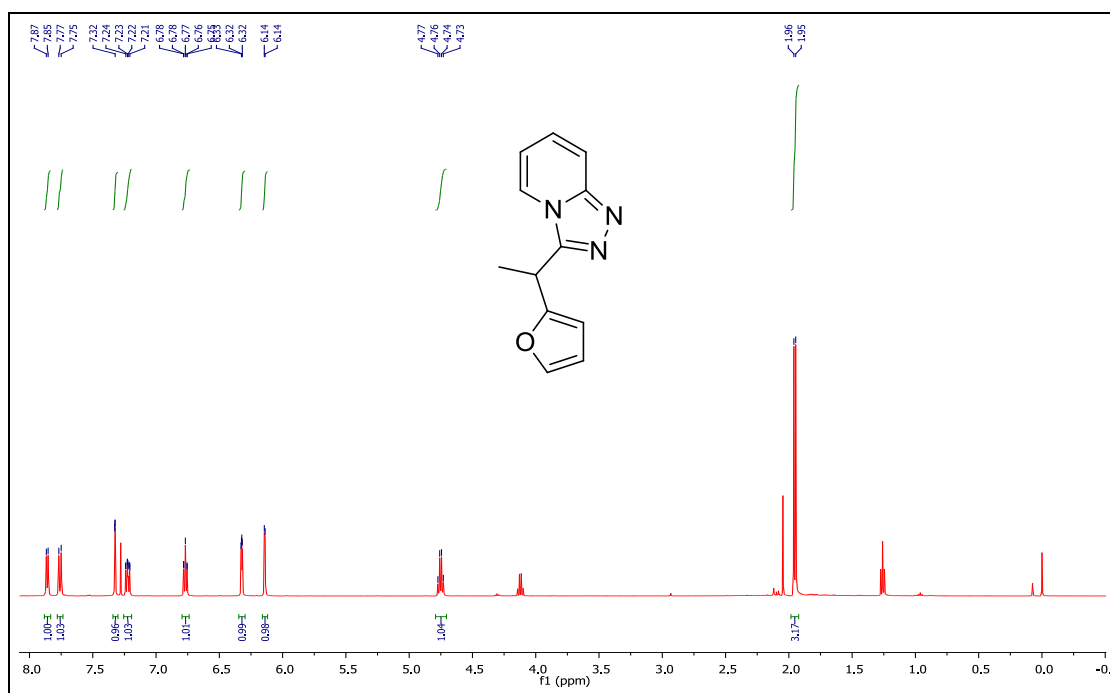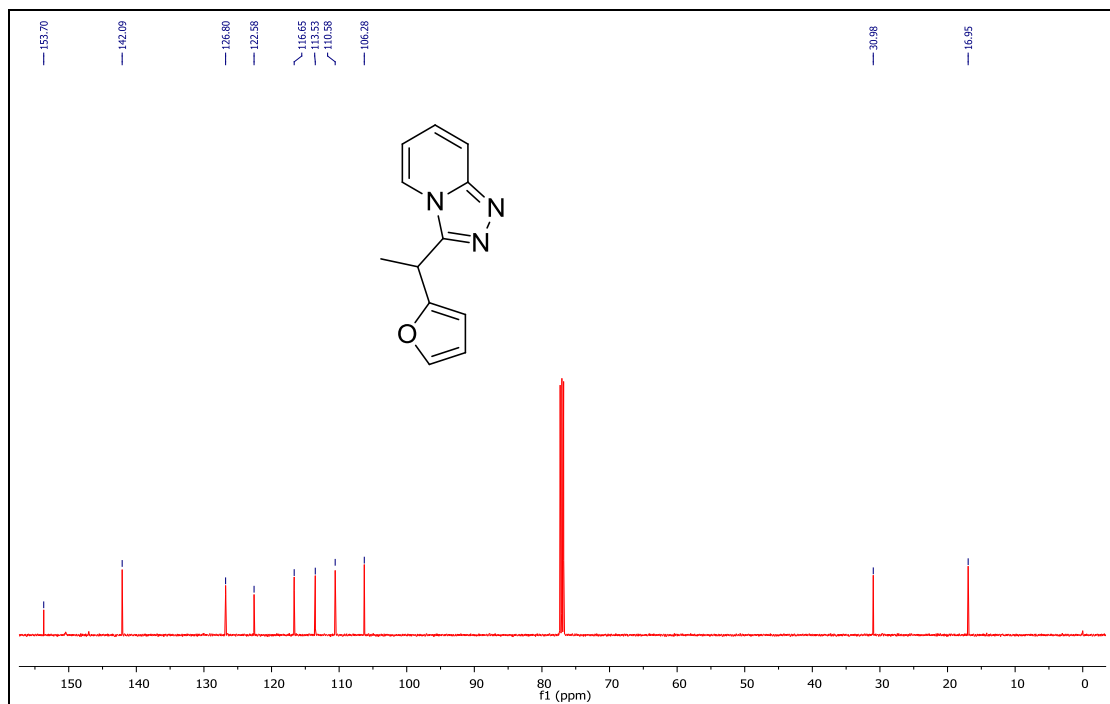

### 3-(1-(Thiophen-2-yl)ethyl)-[1,2,4]triazolo[4,3-a]pyridine (3o)

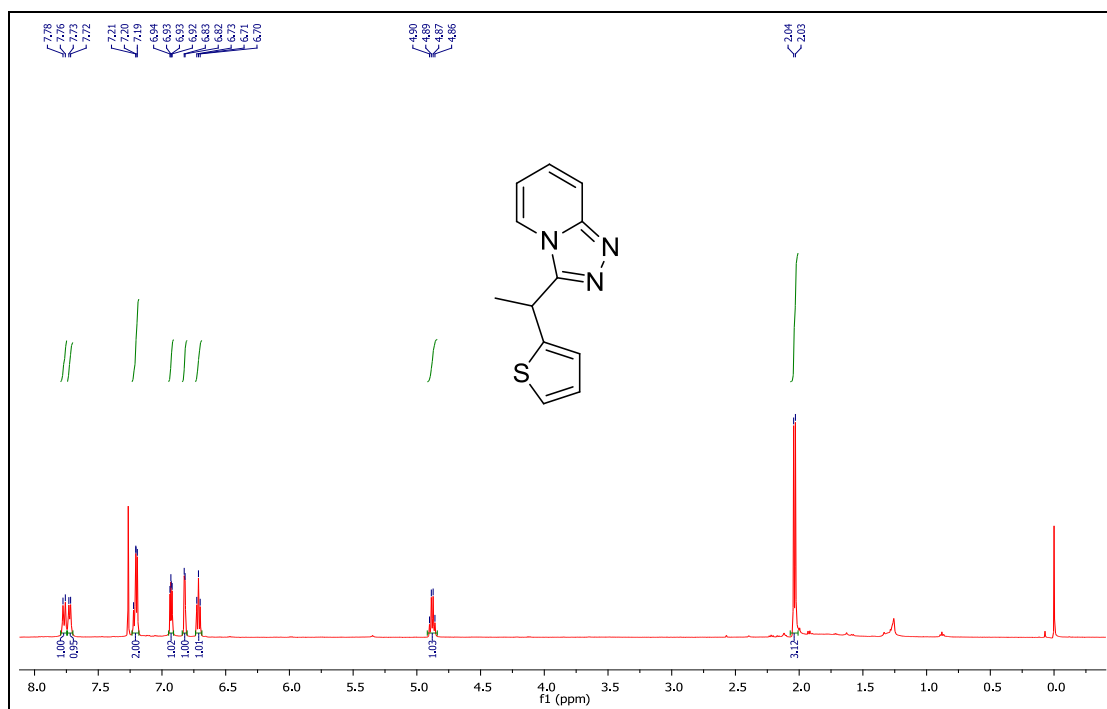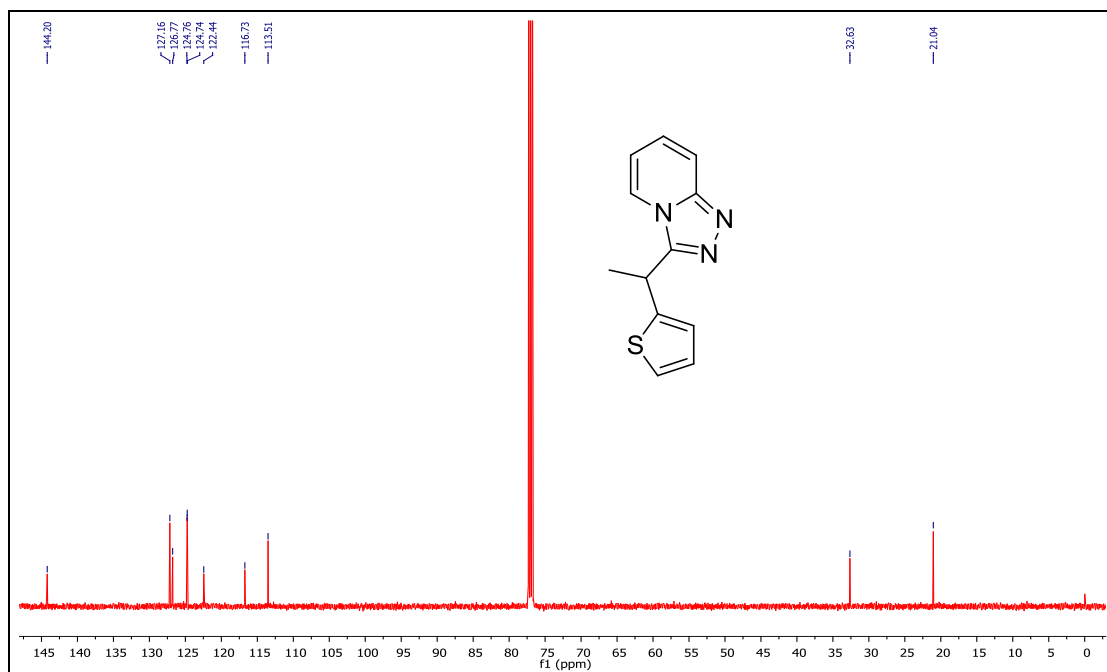



### 3-Benzyl-[1,2,4]triazolo[4,3-a]pyridine (3q)

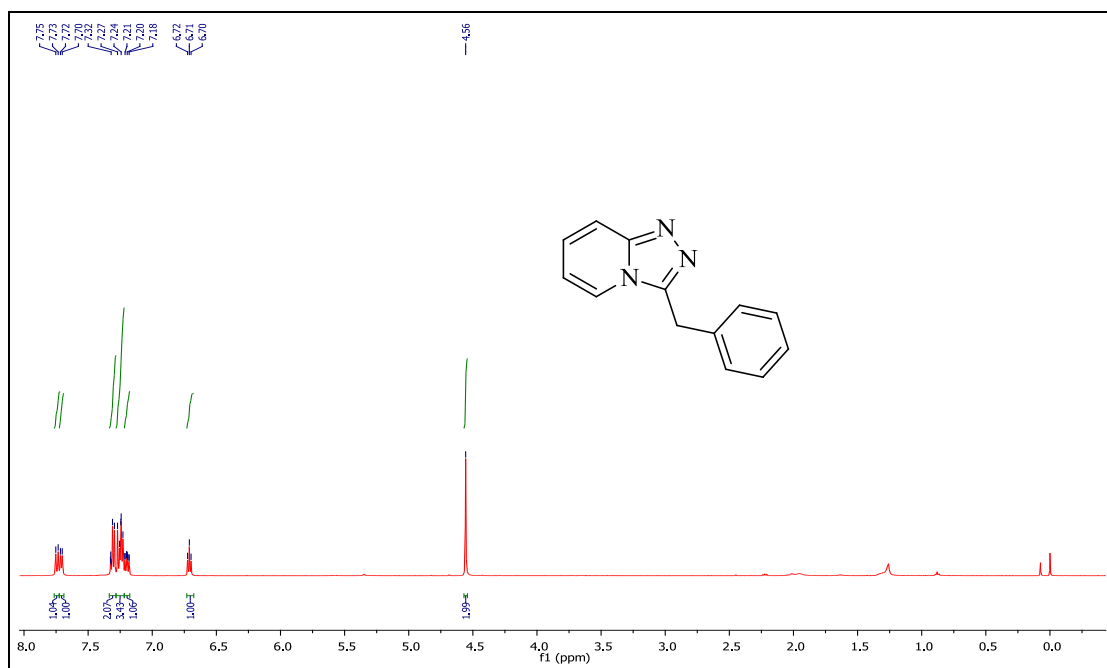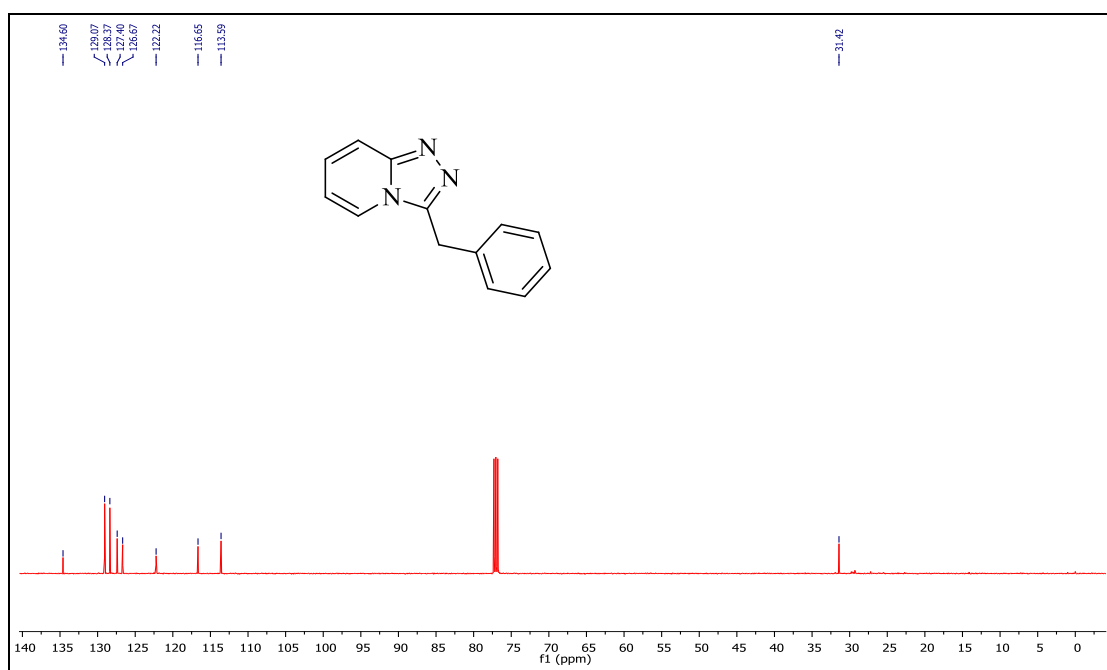

### 3-Benzhydryl-[1,2,4]triazolo[4,3-a]pyridine (3r)

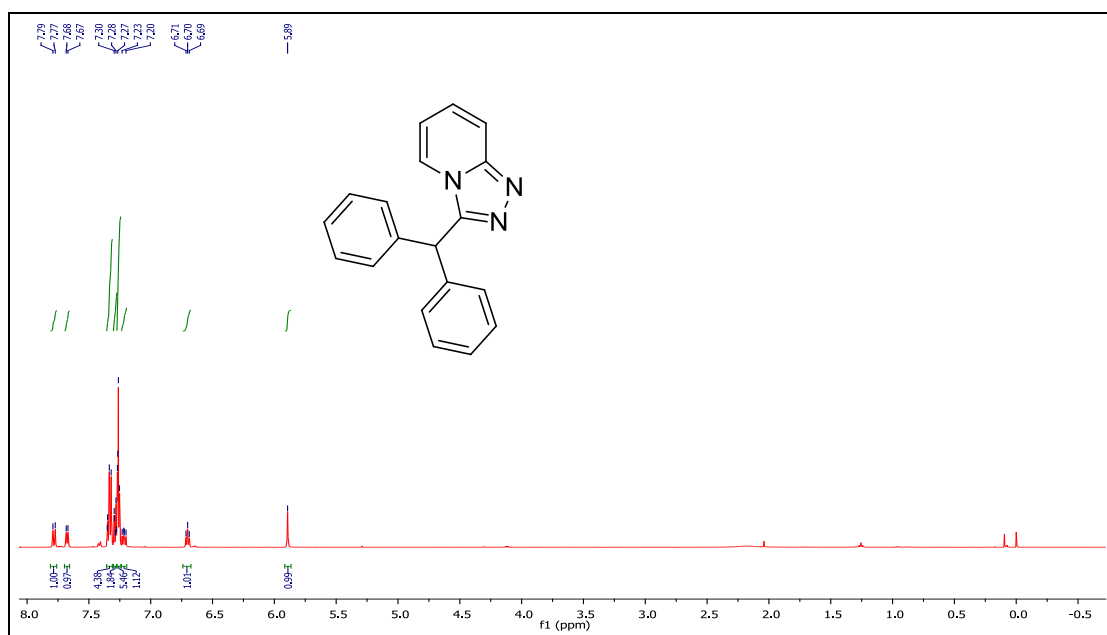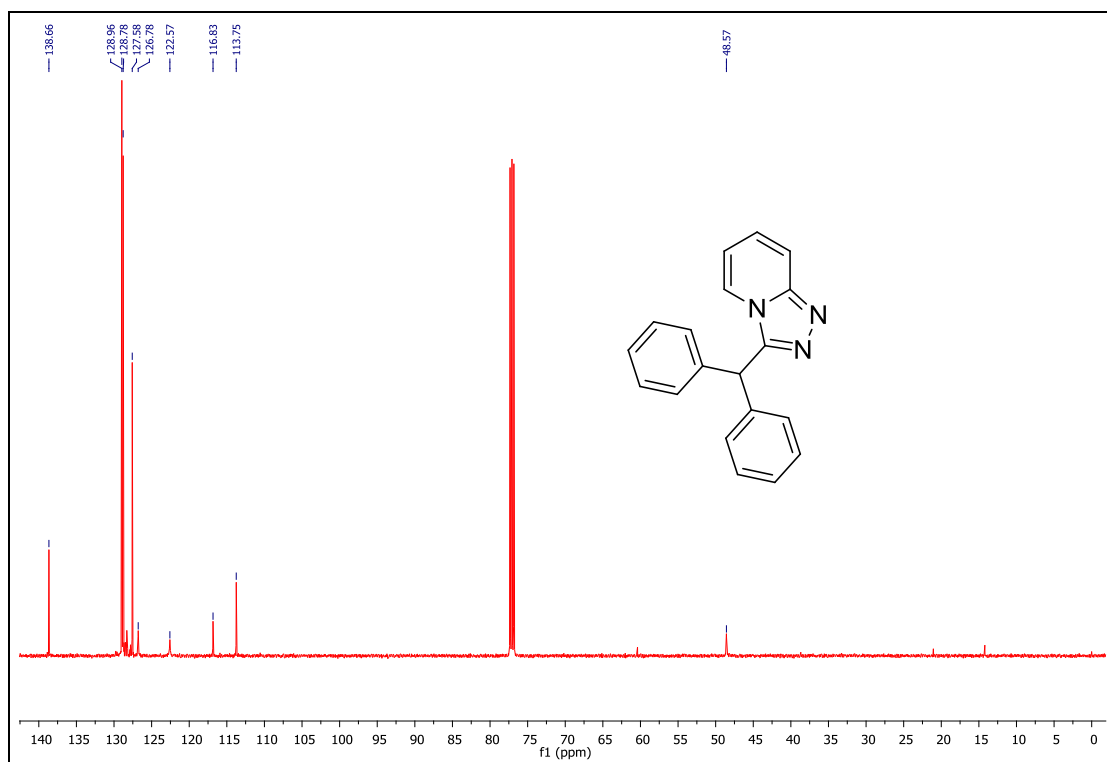





**6-Bromo-3-(1-phenylethyl)-[1,2,4]triazolo[4,3-a]pyridine(5b)**

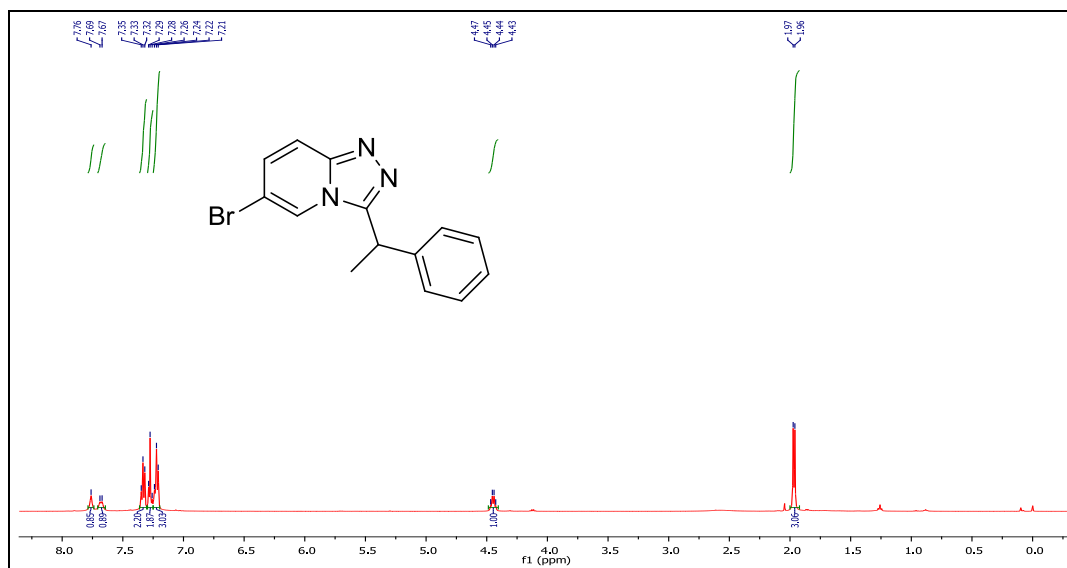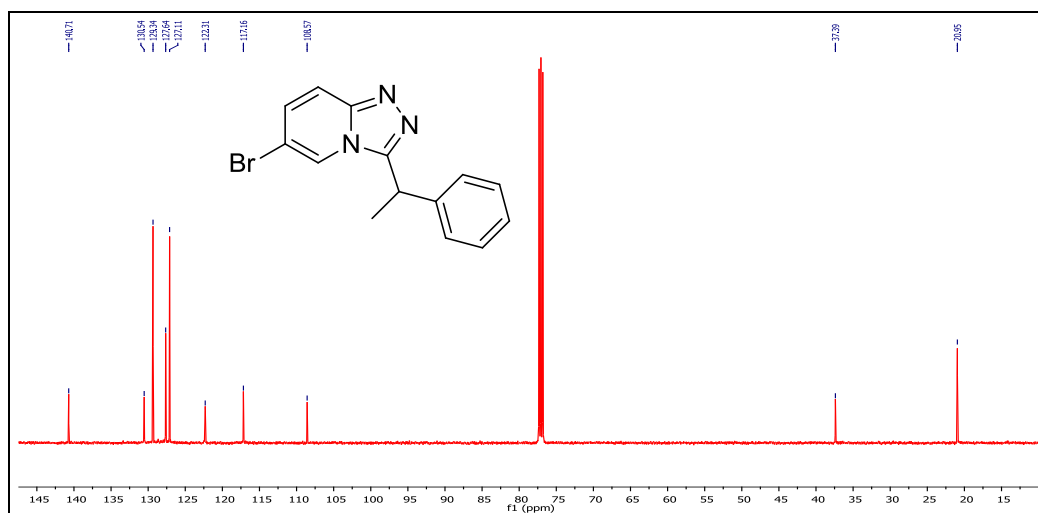

Supplement: c9ob01433k1.pdf [file c9ob01433k1.pdf]
